# Supplementary material for: The Expression of the Endocannabinoid Receptors CB2 and GPR55 is Highly Increased during the Progression of Alzheimer’s Disease in AppNL-G-F Knock-In Mice
Source: MDPI journal article supplement (doi:10.3390/biology12060805), 2023-05-31
Supplement: s1 [file s1]

## The Expression of the Endocannabinoid Receptors CB2 and GPR55 is Highly Increased during the Progression of Alzheimer's Disease in *App*<sup>NL-G-F</sup> Knock-In Mice

Dina Medina-Vera <sup>1,2</sup>, Hongjing Zhao <sup>3,4</sup>, Erika Berezki <sup>4</sup>, Cristina Rosell-Valle <sup>1</sup>, Makoto Shimozawa<sup>4</sup>, Gefei Chen<sup>5</sup>, Fernando Rodríguez de Fonseca <sup>1</sup>, Per Nilsson <sup>4,†</sup>, Simone Tambaro<sup>4,\*†</sup>

**Figure S1:** Immunoreactivity of GPR55 in the prefrontal cortex of 12-month-old *App*<sup>WT</sup> and *App*<sup>NL-G-F</sup> mice.

**Figure S2:** Representative figure showing isolated Astrocyte and Microglia cell culture purity.

**Figure S3:** Negative control images of GPR55 immunostaining in mouse *App*<sup>NL-G-F</sup> primary cell cultures.

**Figure S4:** Marked Iba1 and GPR55 immunoreactivity were observed in microglia APP cells that were treated for 24h with Aβ<sub>42</sub>(1μm).

**Figure S5:** Changes in CB2 and GPR55 fluorescence intensity after Aβ<sub>42</sub> treatment versus control non-treated (con).

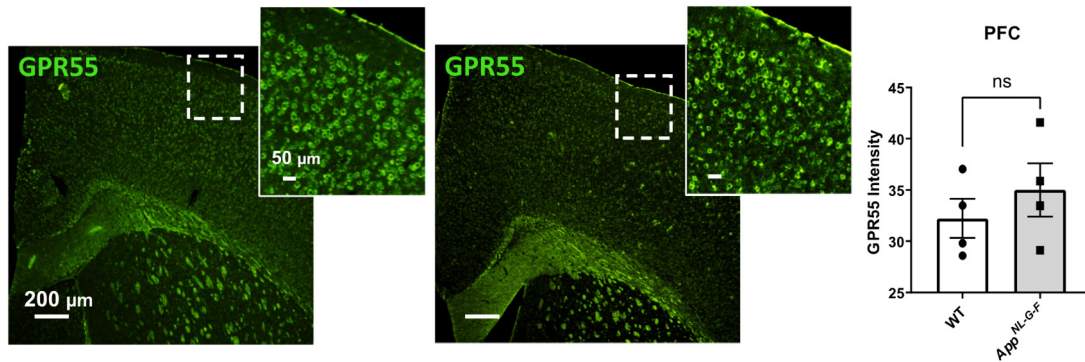

**Figure S1:** GPR55 expression in the prefrontal cortex of WT and *App*<sup>NL-G-F</sup> mice at 12 months of age. Immunofluorescence images show the widespread distribution of GPR55 receptors (green) in the prefrontal cortex (PFC), revealing no genotype-dependent changes. Scale bars represent 200 μm. Data represent mean ± S.E.M. ( $n = 4$  mice per group and 2 sections per mouse were used for quantification). A T-test was performed.

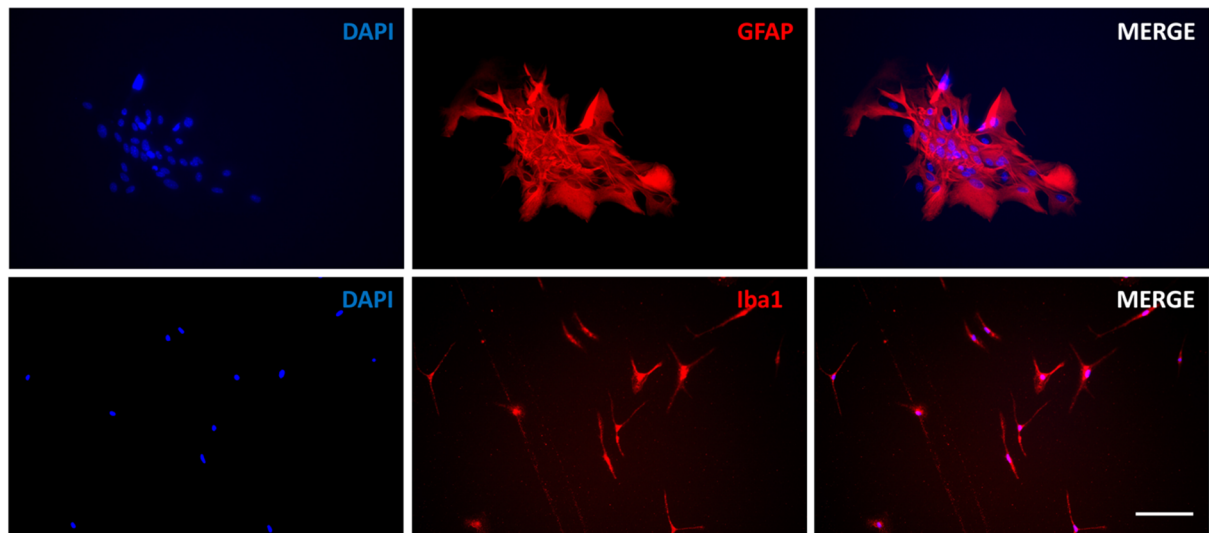

**Figure S2:** Representative figure showing isolated Astrocyte and Microglia cell culture purity. Mouse WT primary astrocyte cells were isolated by mild trypsinization (0,08% trypsin) from a mixed glia culture and plated in a 24-well plate. The remaining cells were considered microglial cells and were detached using 0.25% trypsin and plated in a 24-well plate. The purity of the two cell preparations was confirmed by the nuclear cell staining (DAPI) merged with the astrocyte-specific marker GFAP for the astrocyte-purify culture and by the merge of the nuclear cell staining DAPI with the microglia-specific marker Iba1 for the microglia-purify culture. Scale bar =100  $\mu$ m.

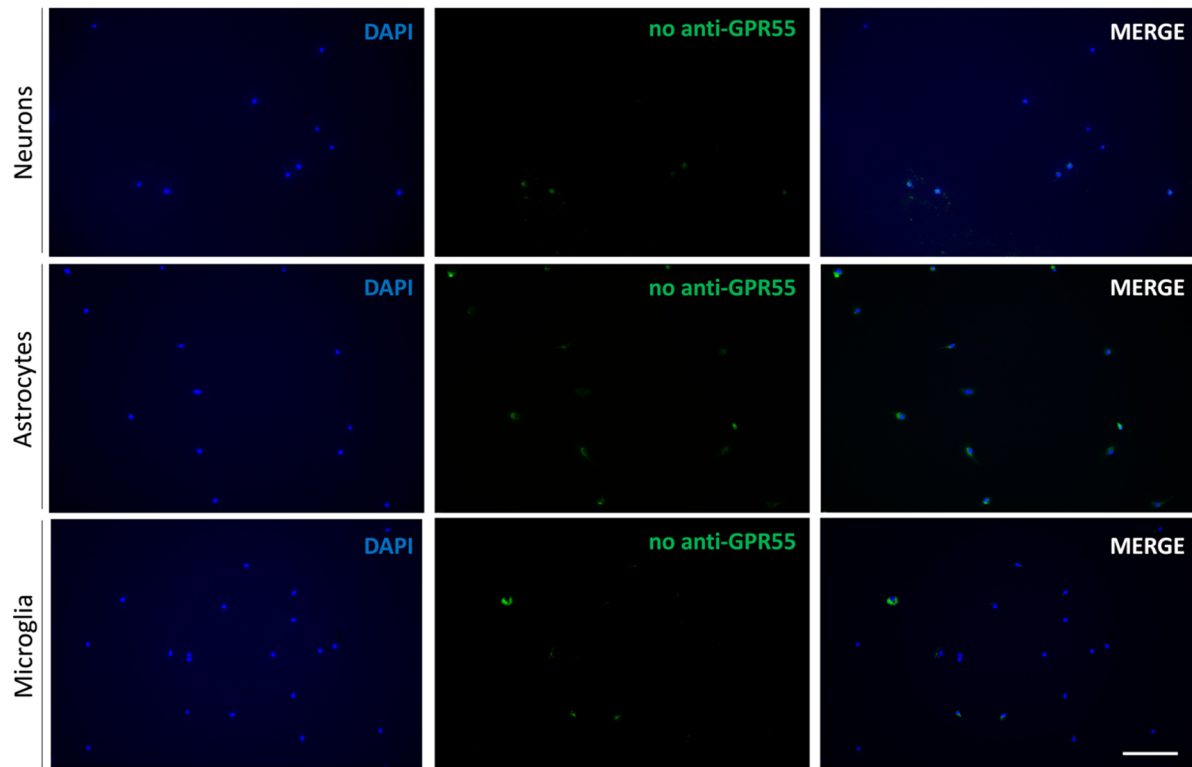

**Figure S3:** Negative control images of GPR55 immunostaining in mouse *App*<sup>NL-G-F</sup> primary cell cultures. Representative negative control images related to Figure 8, showing the nuclear (DAPI, in blue), omitting GPR55 primary antibody (no anti-GPR55) with the only secondary antibody anti-rabbit AlexaFluor 488 (A32731 Invitrogen, in green), and their combination (Merge) in isolated neurons, astrocytes, and microglia. Scale bar =100  $\mu$ m.

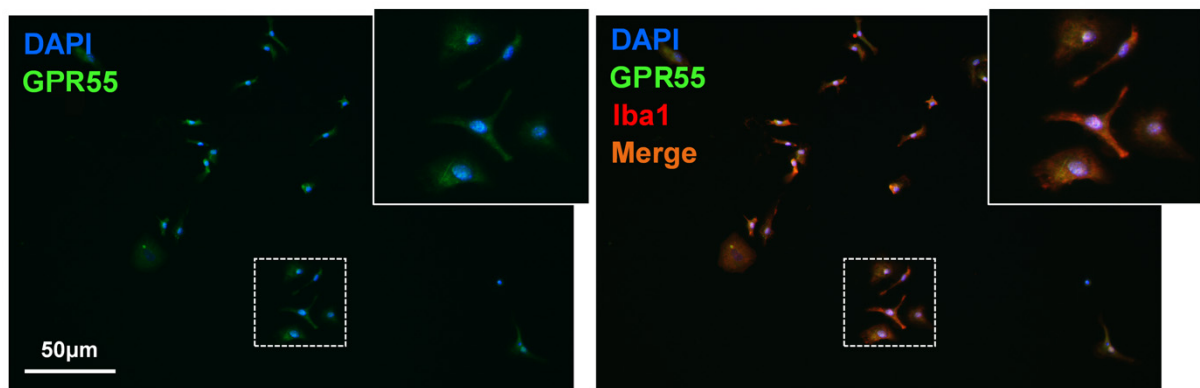

**Figure S4:** Representative immunostaining of GPR55 in *App<sup>NL-G-F</sup>* microglia after A $\beta$ 42 treatment. The cells were treated with A $\beta$ 42 1 $\mu$ M for 24 h. The microglia cells were stained with anti-GPR55 (green), DAPI (blue), and anti-Iba1 microglia marker (red). Scale bar =50 $\mu$ m.

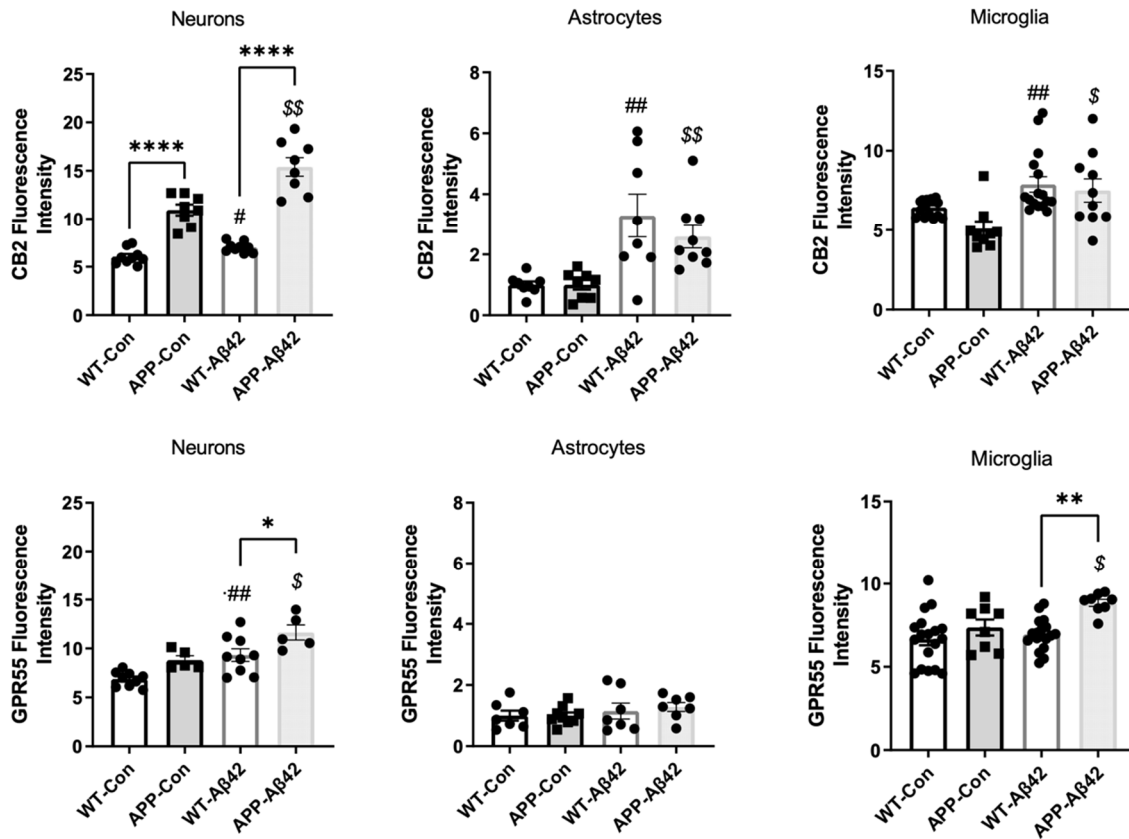

**Figure S5:** CB2 and GPR55 fluorescence intensity levels in non-treated and Aβ42-treated WT and *App<sup>NL-G-F</sup>* mice primary cell cultures. Graphs are presented as Means ± SEM. Each treatment was performed at least in triplicates, and from each slide, at least 2 images were used for quantification. In the GPR55 staining, in the experimental neuronal group *App<sup>NL-G-F</sup>* treated with Aβ42, one data point was identified and excluded as an outlier. Two-way ANOVA followed by Tukey's multiple comparison tests was used, \* denotes  $p < 0.05$ , \*\* denotes  $p < 0.01$ , and \*\*\*\* denotes  $p < 0.0001$ ; # denotes  $p < 0.05$  and ## denotes  $p < 0.01$  WT-Con vs. WT-Aβ42; \$ denotes  $p < 0.05$  and \$\$ denotes  $p < 0.01$  APP-Con vs. APP-Aβ42.
